# Supplementary material for: Mutational Analysis of Extranodal NK/T-Cell Lymphoma Using Targeted Sequencing with a Comprehensive Cancer Panel
Source: PubMed Central journal article supplement — Genomics Inform. 2016 Sep 30;14(3):78–84. doi: 10.5808/GI.2016.14.3.78 (PMC5056900; doi:10.5808/gi.2016.14.3.78), 2016-09-30
Supplement: gni-14-78-s001.pdf [file gni-14-78-s001.pdf]

## SUPPLEMENTARY INFORMATION

### **Mutational Analysis of Extranodal NK/T-Cell Lymphoma Using Targeted Sequencing with a Comprehensive Cancer Panel**

**Seungkyu Choi<sup>1</sup>, Jai Hyang Go<sup>1</sup>, Eun Kyung Kim<sup>2</sup>, Hojung Lee<sup>2</sup>,  
Won Mi Lee<sup>2</sup>, Chun-Sung Cho<sup>3</sup>, Kyudong Han<sup>4\*</sup>**

<sup>1</sup>Department of Pathology, Dankook University College of Medicine, Cheonan 31116, Korea, <sup>2</sup>Department of Pathology, Eulji Medical Center, Eulji University School of Medicine, Seoul 01830, Korea, <sup>3</sup>Department of Neurosurgery, Dankook University College of Medicine, Cheonan 31116, Korea, <sup>4</sup>Department of Nanobiomedical Science, BK21 PLUS NBM Global Research Center for Regenerative Medicine, Dankook University, Cheonan 31116, Korea

**Supplementary Table 1.** Clinical information

| Case No. | Age (y) | Sex    | Site                | EBV ISH  |
|----------|---------|--------|---------------------|----------|
| 1        | 58      | Male   | Nasal cavity        | Positive |
| 2        | 46      | Female | Nasal cavity        | Negative |
| 3        | 66      | Female | Submandibular gland | Positive |
| 4        | 77      | Male   | Nasal cavity        | Positive |
| 5        | 80      | Male   | Nasal cavity        | Positive |

EBV ISH, Epstein-Barr virus-encoded small RNA in situ hybridization.
