# Supplementary material for: Mutational Analysis of Extranodal NK/T-Cell Lymphoma Using Targeted Sequencing with a Comprehensive Cancer Panel
Source: PubMed Central journal article supplement — Genomics Inform. 2016 Sep 30;14(3):78–84. doi: 10.5808/GI.2016.14.3.78 (PMC5056900; doi:10.5808/gi.2016.14.3.78), 2016-09-30
Supplement: gni-14-78-s002.pdf [file gni-14-78-s002.pdf]

## SUPPLEMENTARY INFORMATION

### **Mutational Analysis of Extranodal NK/T-Cell Lymphoma Using Targeted Sequencing with a Comprehensive Cancer Panel**

**Seungkyu Choi<sup>1</sup>, Jai Hyang Go<sup>1</sup>, Eun Kyung Kim<sup>2</sup>, Hojung Lee<sup>2</sup>,  
Won Mi Lee<sup>2</sup>, Chun-Sung Cho<sup>3</sup>, Kyudong Han<sup>4\*</sup>**

<sup>1</sup>Department of Pathology, Dankook University College of Medicine, Cheonan 31116, Korea, <sup>2</sup>Department of Pathology, Eulji Medical Center, Eulji University School of Medicine, Seoul 01830, Korea, <sup>3</sup>Department of Neurosurgery, Dankook University College of Medicine, Cheonan 31116, Korea, <sup>4</sup>Department of Nanobiomedical Science, BK21 PLUS NBM Global Research Center for Regenerative Medicine, Dankook University, Cheonan 31116, Korea

**Supplementary Table 2.** Sample quality control results

| Sample No. | Concentration fluorescence (ng/ $\mu$ L) | Fluorescence quantum ( $\mu$ g) | Concentration UV (ng/ $\mu$ L) | UV quantum ( $\mu$ g) | Volume ( $\mu$ L) | 260/280 ratio | 260/230 ratio |
|------------|------------------------------------------|---------------------------------|--------------------------------|-----------------------|-------------------|---------------|---------------|
| 1 (B1)     | 136                                      | 2.2                             | 467.2                          | 7.5                   | 16                | 1.89          | 1.84          |
| 2 (C1)     | 97.4                                     | 1.6                             | 340.5                          | 5.4                   | 16                | 1.77          | 1.95          |
| 3 (D1)     | 380                                      | 6.1                             | 1,246.7                        | 19.9                  | 16                | 1.90          | 2.05          |
| 4 (E1)     | 78.2                                     | 1.3                             | 492.1                          | 7.9                   | 16                | 1.94          | 1.53          |
| 5 (F1)     | 294                                      | 4.7                             | 901.5                          | 14.4                  | 16                | 1.89          | 2.11          |

UV, ultraviolet.
