# Supplementary material for: Mutational Analysis of Extranodal NK/T-Cell Lymphoma Using Targeted Sequencing with a Comprehensive Cancer Panel
Source: PubMed Central journal article supplement — Genomics Inform. 2016 Sep 30;14(3):78–84. doi: 10.5808/GI.2016.14.3.78 (PMC5056900; doi:10.5808/gi.2016.14.3.78), 2016-09-30
Supplement: gni-14-78-s003.pdf [file gni-14-78-s003.pdf]

## SUPPLEMENTARY INFORMATION

### **Mutational Analysis of Extranodal NK/T-Cell Lymphoma Using Targeted Sequencing with a Comprehensive Cancer Panel**

**Seungkyu Choi<sup>1</sup>, Jai Hyang Go<sup>1</sup>, Eun Kyung Kim<sup>2</sup>, Hojung Lee<sup>2</sup>,  
Won Mi Lee<sup>2</sup>, Chun-Sung Cho<sup>3</sup>, Kyudong Han<sup>4\*</sup>**

<sup>1</sup>Department of Pathology, Dankook University College of Medicine, Cheonan 31116, Korea, <sup>2</sup>Department of Pathology, Eulji Medical Center, Eulji University School of Medicine, Seoul 01830, Korea, <sup>3</sup>Department of Neurosurgery, Dankook University College of Medicine, Cheonan 31116, Korea, <sup>4</sup>Department of Nanobiomedical Science, BK21 PLUS NBM Global Research Center for Regenerative Medicine, Dankook University, Cheonan 31116, Korea

**Supplementary Table 3. Primer pairs used in Sanger sequencing**

| Gene          | Location | Position  | Variants   | Forward Primer (5'-3') | Reverse Primer (5'-3') |
|---------------|----------|-----------|------------|------------------------|------------------------|
| <i>ARID1A</i> | chr.1    | 27057772  | c.1480C>A  | CTTCTGGCTCAGTTTAGGC    | GCTGAGGTTGCTGCTGCT     |
| <i>SETD2</i>  | chr.3    | 47125371  | c.5899G>C  | ATCTGGCTGTTCTTGGCTCC   | GGACAGTGCAATCTCTGATGC  |
| <i>ATR</i>    | chr.3    | 142281160 | c.1084G>T  | AGTCCATAATAGTGAGCCAGAC | GGAGGACTACCAGCACAAAC   |
| <i>FLT4</i>   | chr.5    | 180053021 | c.1267delC | GTTCAAGTTCAGAGCAGGGC   | CCTGGAGCTGGTGGTGAAT    |
| <i>SYNE1</i>  | chr.6    | 152542053 | c.21785C>A | CTTGGGCAGTCTAAGAAGG    | GCCATCATCCTCATTACCTA   |
| <i>SBDS</i>   | chr.7    | 66453482  | c.629G>T   | CAAGGCATGAGACAGAGTAGC  | GCTACATGGACACTTGAGGGG  |
| <i>FGFR1</i>  | chr.8    | 38271514  | c.2307T>G  | TCAGCGGCGTTTGAGTCC     | GCTGCTGAAGGAGGGTCACC   |
| <i>IKBKB</i>  | chr.8    | 42166425  | c.574G>C   | CCTACTGGAGTGAGTGGGAC   | GGCTCAGAATCCACATGAAG   |
| <i>KAT6B</i>  | chr.10   | 76789733  | c.5151C>A  | TCCACAGATTGCCACCACG    | GCCTTGAGGAGACTTGACGC   |
| <i>KMT2D</i>  | chr.12   | 49443790  | c.3581C>A  | CTCTAATCACATCCCGCAGC   | CCTTGAACCCAGTGCCA      |
| <i>BCL11B</i> | chr.14   | 99641785  | c.1388C>A  | CTGCTTGTCGGCCAGGAG     | GTGCCTTCGACCGAGTCA     |
| <i>THBS1</i>  | chr.15   | 39885207  | c.2774G>T  | CAAGGGAGATGCCTGTGACC   | CCTCAGCACCCACAGGGATA   |
| <i>MYH11</i>  | chr.16   | 15818830  | c.3899C>A  | TGTTGAGAGTGAGATGTGGC   | GGTGACGGAGTTCCTTCAA    |
| <i>CDH11</i>  | chr.16   | 65032524  | c.464A>T   | GACATCAATACGCACTAGCG   | GGAAGGAGCTGGAACCAT     |
| <i>TP53</i>   | chr.17   | 7577120   | c.818G>C   | TCCAATTGATAAGAGGTCCC   | GCTTCTCCTCCACCTACCTG   |
| <i>PER1</i>   | chr.17   | 8052944   | c.689G>T   | CAGACAGGAGAGGAGTGAGC   | CCTCACTGCCTCCACTCT     |
| <i>ZNF521</i> | chr.18   | 22804540  | c.3342T>G  | TGTGCTGTTGCTGTCTGGC    | GCAGACAGTGACCTCCACCT   |
| <i>MBD1</i>   | chr.18   | 47799274  | c.1636G>T  | ACTGCTGTATCTCGGAAGCG   | GCGGAGTGGTCTGTAAGCAG   |
| <i>ERG</i>    | chr.21   | 39755432  | c.1354T>A  | AAGACTTCAGTAACTCCCTCCC | CGCTACGCCTACAAGTTCG    |
| <i>BCR</i>    | chr.22   | 23656767  | c.3592A>T  | GAGTCACATCAAGTAGGAGACC | GGACATGACCTCCAAGGA     |
| <i>MYH9</i>   | chr.22   | 36681794  | c.5184G>C  | GAACACCCAACACAGAAGCC   | GGATGGTCTTGTGGGGCTG    |
| <i>MYH9</i>   | chr.22   | 36745022  | c.260C>A   | CCAGCACTCCTTCAAGCCC    | CGACTGGGCTGCCAAGAA     |
