# Supplementary material for: Mutational Analysis of Extranodal NK/T-Cell Lymphoma Using Targeted Sequencing with a Comprehensive Cancer Panel
Source: PubMed Central journal article supplement — Genomics Inform. 2016 Sep 30;14(3):78–84. doi: 10.5808/GI.2016.14.3.78 (PMC5056900; doi:10.5808/gi.2016.14.3.78), 2016-09-30
Supplement: gni-14-78-s004.pdf [file gni-14-78-s004.pdf]

## **SUPPLEMENTARY INFORMATION**

### **Mutational Analysis of Extranodal NK/T-Cell Lymphoma Using Targeted Sequencing with a Comprehensive Cancer Panel**

**Seungkyu Choi<sup>1</sup>, Jai Hyang Go<sup>1</sup>, Eun Kyung Kim<sup>2</sup>, Hojung Lee<sup>2</sup>,  
Won Mi Lee<sup>2</sup>, Chun-Sung Cho<sup>3</sup>, Kyudong Han<sup>4\*</sup>**

<sup>1</sup>Department of Pathology, Dankook University College of Medicine, Cheonan 31116, Korea, <sup>2</sup>Department of Pathology, Eulji Medical Center, Eulji University School of Medicine, Seoul 01830, Korea, <sup>3</sup>Department of Neurosurgery, Dankook University College of Medicine, Cheonan 31116, Korea, <sup>4</sup>Department of Nanobiomedical Science, BK21 PLUS NBM Global Research Center for Regenerative Medicine, Dankook University, Cheonan 31116, Korea

**Supplementary Table 4.** Statistics of sequencing data

|                                          | Case No.   |            |            |            |            |
|------------------------------------------|------------|------------|------------|------------|------------|
|                                          | 1          | 2          | 3          | 4          | 5          |
| No. of mapped reads                      | 30011197   | 20141112   | 26154647   | 19948919   | 19604624   |
| Percent reads on target                  | 99.15      | 96.08      | 98.91      | 97.46      | 99.09      |
| Total aligned base reads                 | 3221573610 | 2152419889 | 2859551662 | 2155768494 | 2168519003 |
| Total base reads on target               | 3121683146 | 2038239169 | 2766357049 | 2061669592 | 2101677011 |
| Bases in target regions                  | 1688650    | 1688650    | 1688650    | 1688650    | 1688650    |
| Percent base reads on target             | 96.90      | 94.70      | 96.74      | 95.64      | 96.92      |
| Average base coverage depth              | 1,849      | 1,207      | 1,638      | 1,221      | 1,245      |
| Uniformity of base coverage (%)          | 47.72      | 38.39      | 42.22      | 39.27      | 37.25      |
| Target base coverage at $\times 1$ (%)   | 93.48      | 87.87      | 90.71      | 88.08      | 85.93      |
| Target base coverage at $\times 20$ (%)  | 72.48      | 57.81      | 64.53      | 58.87      | 56.86      |
| Target base coverage at $\times 100$ (%) | 59.51      | 45.32      | 51.74      | 46.62      | 44.33      |
| Target base coverage at $\times 500$ (%) | 44.73      | 32.11      | 38.59      | 33.06      | 31.67      |
| Target bases with no strand bias (%)     | 92.68      | 92.76      | 92.97      | 92.61      | 93.20      |
