# Supplementary material for: Mutational Analysis of Extranodal NK/T-Cell Lymphoma Using Targeted Sequencing with a Comprehensive Cancer Panel
Source: PubMed Central journal article supplement — Genomics Inform. 2016 Sep 30;14(3):78–84. doi: 10.5808/GI.2016.14.3.78 (PMC5056900; doi:10.5808/gi.2016.14.3.78), 2016-09-30
Supplement: gni-14-78-s005.pdf [file gni-14-78-s005.pdf]

## SUPPLEMENTARY INFORMATION

### **Mutational Analysis of Extranodal NK/T-Cell Lymphoma Using Targeted Sequencing with a Comprehensive Cancer Panel**

**Seungkyu Choi<sup>1</sup>, Jai Hyang Go<sup>1</sup>, Eun Kyung Kim<sup>2</sup>, Hojung Lee<sup>2</sup>,  
Won Mi Lee<sup>2</sup>, Chun-Sung Cho<sup>3</sup>, Kyudong Han<sup>4\*</sup>**

<sup>1</sup>Department of Pathology, Dankook University College of Medicine, Cheonan 31116, Korea, <sup>2</sup>Department of Pathology, Eulji Medical Center, Eulji University School of Medicine, Seoul 01830, Korea, <sup>3</sup>Department of Neurosurgery, Dankook University College of Medicine, Cheonan 31116, Korea, <sup>4</sup>Department of Nanobiomedical Science, BK21 PLUS NBM Global Research Center for Regenerative Medicine, Dankook University, Cheonan 31116, Korea

**Supplementary Table 5. Variant regions of each sample**

|                                                     | Case No. |       |       |       |     |
|-----------------------------------------------------|----------|-------|-------|-------|-----|
|                                                     | 1        | 2     | 3     | 4     | 5   |
| Missense                                            | 143      | 1,335 | 259   | 608   | 151 |
| Synonymous                                          | 234      | 1,038 | 304   | 532   | 220 |
| Intron                                              | 317      | 787   | 341   | 528   | 258 |
| Splice region & intron                              | 33       | 102   | 42    | 68    | 31  |
| Frameshift                                          | 26       | 14    | 14    | 10    | 10  |
| Stop gained                                         | 1        | 87    | 6     | 37    | 3   |
| Missense & splice region                            | 1        | 30    | 2     | 12    | 2   |
| Intragenic                                          | 203      | 568   | 228   | 363   | 176 |
| 5 prime UTR                                         | 11       | 30    | 19    | 27    | 6   |
| Splice region & synonymous                          | 2        | 20    | 5     | 15    | 2   |
| 3 prime UTR                                         | 17       | 39    | 20    | 25    | 10  |
| Splice donor & intron                               | 0        | 14    | 1     | 12    | 2   |
| Splice acceptor & intron                            | 0        | 11    | 1     | 2     | 0   |
| In-frame insertion                                  | 2        | 1     | 1     | 1     | 1   |
| Disruptive in-frame deletion                        | 0        | 0     | 0     | 1     | 0   |
| Splice donor & missense & splice region<br>& intron | 0        | 0     | 0     | 2     | 0   |
| Stop gained & splice region                         | 0        | 3     | 0     | 3     | 0   |
| Noncoding exon                                      | 3        | 5     | 3     | 5     | 4   |
| In-frame deletion                                   | 2        | 1     | 1     | 1     | 0   |
| 5 prime UTR premature start codon gain              | 0        | 8     | 3     | 1     | 2   |
| Disruptive in-frame insertion                       | 1        | 2     | 2     | 0     | 1   |
| Stop retained                                       | 0        | 0     | 1     | 0     | 1   |
| Frameshift variant & splice region                  | 0        | 1     | 1     | 0     | 0   |
| Unclassified                                        | 2        | 3     | 2     | 3     | 1   |
| Total variants                                      | 998      | 4,099 | 1,256 | 2,256 | 881 |
