# Supplementary material for: Mutational Analysis of Extranodal NK/T-Cell Lymphoma Using Targeted Sequencing with a Comprehensive Cancer Panel
Source: PubMed Central journal article supplement — Genomics Inform. 2016 Sep 30;14(3):78–84. doi: 10.5808/GI.2016.14.3.78 (PMC5056900; doi:10.5808/gi.2016.14.3.78), 2016-09-30
Supplement: gni-14-78-s006.pdf [file gni-14-78-s006.pdf]

## SUPPLEMENTARY INFORMATION

### **Mutational Analysis of Extranodal NK/T-Cell Lymphoma Using Targeted Sequencing with a Comprehensive Cancer Panel**

**Seungkyu Choi<sup>1</sup>, Jai Hyang Go<sup>1</sup>, Eun Kyung Kim<sup>2</sup>, Hojung Lee<sup>2</sup>,  
Won Mi Lee<sup>2</sup>, Chun-Sung Cho<sup>3</sup>, Kyudong Han<sup>4\*</sup>**

<sup>1</sup>Department of Pathology, Dankook University College of Medicine, Cheonan 31116, Korea, <sup>2</sup>Department of Pathology, Eulji Medical Center, Eulji University School of Medicine, Seoul 01830, Korea, <sup>3</sup>Department of Neurosurgery, Dankook University College of Medicine, Cheonan 31116, Korea, <sup>4</sup>Department of Nanobiomedical Science, BK21 PLUS NBM Global Research Center for Regenerative Medicine, Dankook University, Cheonan 31116, Korea

|        |        |        |        |         |         |          |        |
|--------|--------|--------|--------|---------|---------|----------|--------|
| IDH1   | KRAS   | MLL1   | NFKB2  | PRKCB   | RARA    | SQCS1    | TOP1   |
| IDH2   | LAMP1  | MLL    | NIN    | PRKCA   | RB1     | SOX11    | TP53   |
| IGF1R  | LCK    | MLL2   | NKX2-1 | PRKCB   | RECOL4  | SOX2     | TPR    |
| IGF2   | LIFR   | MLL3   | NLRP1  | PRKCG   | REL     | SRC      | TRIM4  |
| IGF2R  | LPHN3  | MLL7B  | NOTCH1 | PRKCG   | RET     | SSX1     | TRIM3  |
| IKBKB  | POT1   | MMP2   | NOTCH2 | PIK3R1  | RHOH    | STK11    | TRIP11 |
| IKBKE  | LPP    | MN1    | NOTCH4 | PIK3R2  | RNASEL  | STK34    | TRRAP  |
| IKZF1  | LAP1B  | MPL    | NPM1   | PIK1    | RNF2    | SUFU     | TSC1   |
| IL2    | LTF    | MRE11A | NRAS   | PIK4D1  | RNF213  | SYK      | TSC2   |
| IL21R  | LTX    | MSH2   | NSD1   | PLA01   | R051    | SINE1    | TSR1   |
| IL4ST  | MAF    | MSH4   | NTRK1  | PLC01   | RPS4KA2 | TAF1     | UBR5   |
| IL7R   | MAFB   | MTOR   | NTRK3  | PLEKHA5 | RBM1    | TAF1L    | UGT1A1 |
| INHA   | MAGEA1 | MTR    | NUMA1  | PML     | RUNB1   | TAL1     | USP9X  |
| IRF4   | MAGI1  | MTRR   | NUP214 | PMS1    | RUNX1T1 | TBK2     | VHL    |
| IRS2   | MAL71  | MUC1   | NUP98  | PMS2    | SAMD9   | TCF12    | WAS    |
| ITGA10 | MAML2  | MUTYH  | PAK3   | POU5F1  | SBS5    | TCF3     | MNSC1  |
| ITGA9  | MAP2K1 | MIB1   | PALB2  | PPARG   | SDHA    | TCF7L1   | WRN    |
| ITGB2  | MAP2K2 | MYC    | PARP1  | PPP2R1A | SDHB    | TCF7L2   | WT1    |
| ITGB3  | MAP2K4 | MYCL1  | PAK3   | PRDM1   | SDHC    | TCL1A    | XPA    |
| JAK1   | MAP3K7 | MYCN   | PAK5   | PRKAR1A | SOHD    | TET1     | XPC    |
| JAK2   | MAPK1  | MYO8B  | PAK7   | PRKDC   | SEPT9   | TET2     | XPO1   |
| JAK3   | MAPK8  | MYH11  | PAK8   | PPP1    | SETD2   | TFEB     | XRC2   |
| JUN    | MARK1  | MYH9   | PBRM1  | PITDH1  | SF3B1   | TGFBP2   | ZNF36  |
| KAT5A  | MARK4  | NBN    | PBX1   | PITEN   | SOX1    | TGM7     | ZNF521 |
| KAT5B  | MBO1   | NC0A1  | PDE4DP | PITSS2  | SH2D1A  | TIBS1    |        |
| KDM5C  | MCL1   | NC0A2  | POGFB  | PTPN11  | SMAD2   | TIMP3    |        |
| KDM4A  | KDM4   | NC0A4  | POGFRA | PTPRD   | SMAD4   | TLR4     |        |
| KDR    | KDM4   | NF1    | POGFRB | PTPRT   | SMARCA4 | TLX3     |        |
| KEAP1  | MEN1   | NF2    | PER1   | RAD50   | SMARCB1 | TNFAIP3  |        |
| KIT    | MET    | NFE2L2 | PGAP3  | RAF1    | SMO     | TNFRSF14 |        |
| KLF4   | MTF    | NFKB1  | PHOX2B | RALGDS  | SMU1    | TNN2     |        |

  

|          |        |        |        |         |         |        |          |
|----------|--------|--------|--------|---------|---------|--------|----------|
| ABL1     | AURKA  | BNP1A  | CDK4   | CTNNB1  | EPHB4   | FANCD2 | FZR1     |
| ABL2     | AURKB  | BRAF   | CDK4   | CYLD    | EPHB4   | FANCF  | GAPD     |
| ACVR2A   | AURKC  | BRD3   | CDK8   | CYP2C19 | ERBB2   | FANCG  | GATA1    |
| ADAMTS20 | AVL    | BRIP1  | CDKN2A | CYP2D6  | ERBB3   | FAS    | GATA2    |
| AFF1     | BAI3   | BTX    | CDKN2B | DAXX    | ERBB4   | FBXW7  | GATA3    |
| AFF3     | BAP1   | BUB1B  | CDKN2C | DCC     | ERCC1   | FGFR1  | GDNF     |
| AKAP9    | BCL10  | CARD11 | CEBPA  | DOB2    | ERCC2   | FGFR2  | GNA11    |
| AKT1     | BCL11A | CASC5  | CHEK1  | DDIT3   | ERCC3   | FGFR3  | GNAQ     |
| AKT2     | BCL11B | CSL    | CHEK2  | DOR2    | ERCC4   | FGFR4  | GNAS     |
| AKT3     | BCL2   | CCND1  | CIC    | DEK     | ERCC5   | FH     | GPR124   |
| ALK      | BCL2L1 | CCND2  | CKS1B  | DICER1  | ERG     | FLCN   | GRM8     |
| APC      | BCL2L2 | CCNE1  | CMPK1  | DNM3A   | ESR1    | FLI1   | GUCY1A2  |
| AR       | BCL3   | CD79A  | COL1A1 | DPYD    | ETS1    | FLT1   | HCAR1    |
| ARID1A   | BCL4   | CD79B  | CRBN   | DST     | ETV1    | FLT3   | HIF1A    |
| ARID2    | BCL9   | CDC73  | CREB1  | EGFR    | ETV4    | FLT4   | HLF      |
| ARNT     | BCR    | CDH1   | CREBBP | EML4    | EXT1    | FN1    | HNF1A    |
| ASXL1    | BIRC2  | CDH11  | CRKL   | EP300   | EXT2    | FOXK2  | HOOV3    |
| ATF1     | BIRC3  | CDH2   | CRTC1  | EP400   | EZH2    | F0N1   | HRAS     |
| ATM      | BIRC5  | CDH20  | CSFTR  | EPHA2   | FAM123B | F0N3   | HSP90A1  |
| ATR      | BLM    | CDH5   | C5MD3  | EPHA7   | FANCA   | F0N1   | HSP90AB1 |
| ATRX     | BLNK   | CDK2   | CTNNA1 | EPHB1   | FANCC   | F0N4   | ICK      |

Supplementary Fig. 1. Ion AmpliSeq Comprehensive Cancer Panel target gene list.
