# Supplementary material for: Mutational Analysis of Extranodal NK/T-Cell Lymphoma Using Targeted Sequencing with a Comprehensive Cancer Panel
Source: PubMed Central journal article supplement — Genomics Inform. 2016 Sep 30;14(3):78–84. doi: 10.5808/GI.2016.14.3.78 (PMC5056900; doi:10.5808/gi.2016.14.3.78), 2016-09-30
Supplement: gni-14-78-s011.pdf [file gni-14-78-s011.pdf]

## SUPPLEMENTARY INFORMATION

### **Mutational Analysis of Extranodal NK/T-Cell Lymphoma Using Targeted Sequencing with a Comprehensive Cancer Panel**

**Seungkyu Choi<sup>1</sup>, Jai Hyang Go<sup>1</sup>, Eun Kyung Kim<sup>2</sup>, Hojung Lee<sup>2</sup>,  
Won Mi Lee<sup>2</sup>, Chun-Sung Cho<sup>3</sup>, Kyudong Han<sup>4\*</sup>**

<sup>1</sup>Department of Pathology, Dankook University College of Medicine, Cheonan 31116, Korea, <sup>2</sup>Department of Pathology, Eulji Medical Center, Eulji University School of Medicine, Seoul 01830, Korea, <sup>3</sup>Department of Neurosurgery, Dankook University College of Medicine, Cheonan 31116, Korea, <sup>4</sup>Department of Nanobiomedical Science, BK21 PLUS NBM Global Research Center for Regenerative Medicine, Dankook University, Cheonan 31116, Korea

210 220  
AATAAGATGTCCTG

#5  
c.3592A>T  
p.M1198L

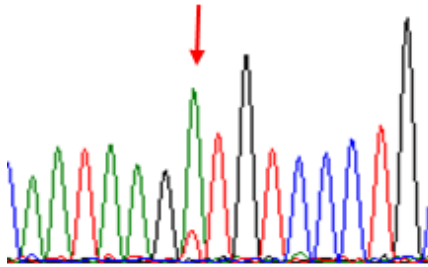

>chr22\_23656767\_BCR (mutation)↵

```
ACACCTCGGGAGAGGTCTCTGGCTCGTTGTGACCCCAAGGAGTAACCCACCGCCTTCTGCAGCTCTTTCAGACCCGGTTGCAAAGGAGAGCTGCATGCTCAAC
CTGCTGCTGTCCCTGCGGAGGCCAACCTGCTCACCTTCCTTTTCCTTCTGGACCACCTGAAAAGGTAGCCCAGCTCTCCCATGGCAGCCAGGGCTCCAGGT
CCCCAGGCCGAGAGTGCCTCTGCTCCCACTAGACCCCAACACCGAGGACCTTTTCTCCTGACCTTGTCTGCAGTCACTCACTGCCTTTGGCGACTAGT
GCCACTGCCACCCCTGCCAGCCTCTCTTTTGGCCACCTCCTCTCTGCACTGTGGCCTTAAAAAAGAGCTCAGAGCTTTGGCCGTGGCCAGCAGTGCA
CTTGGACCCCTCTTCCCTCCGAGTCAATCAAGTAGGAGACCTCCCAACCGCCAGAGCTGGCTCCTTGTCTGGCCACTGAGACCCAGAAGTACCAGG
GCTGGAGTCAGCTTGCAGCACAGCCAGGGTCGAGGTCACTCCCTTCTGAGAACTCCAGCACAGCCAGCCCTCTGCCTCTCTCTGGGGGTGGCGTTGAAA
CAGCACCCGCTGCTTTGGTCTCTACAGGGTGGCAGAGAAGGAGGAGTCAATAAGTGTCCCTGCACAACCTCGCCACGGTCTTTGGCCCCACGCTGCTCCG
GCCCTCCGAGAAGGAGAGCAAGCTCCCTGCCAACCCAGCCAGCCTATCACCATGACTGACAGCTGGTCTTGGAGGTCAATGTCCAGGTATGGGAAGACAGG
CTCCAGCCATGCAACCTGACCTGACAGAGGTGGCCTCTGCCTGCCCCACCCCACTGCTGCCCCA TCTTCTTACTTGCATTTGATGTGGTGTGGCCAAACATT
CACAGAGAGGGACTTGCTTAGTCTGCATGGATGGGAGTGATAGTGGGGGCCAGGCCACCTCTGGTCTGCTAGTGCACCTTTGCTGGAAGCTTAAAACTAC
CTCAAGT↵
```

↵

>hg19↵

```
ACACCTCGGGAGAGGTCTCTGGCTCGTTGTGACCCCAAGGAGTAACCCACCGCCTTCTGCAGCTCTTTCAGACCCGGTTGCAAAGGAGAGCTGCATGCTCAAC
CTGCTGCTGTCCCTGCGGAGGCCAACCTGCTCACCTTCCTTTTCCTTCTGGACCACCTGAAAAGGTAGCCCAGCTCTCCCATGGCAGCCAGGGCTCCAGGT
CCCCAGGCCGAGAGTGCCTCTGCTCCCACTAGACCCCAACACCGAGGACCTTTTCTCCTGACCTTGTCTGCAGTCACTCACTGCCTTTGGCGACTAGT
GCCACTGCCACCCCTGCCAGCCTCTCTTTTGGCCACCTCCTCTCTGCACTGTGGCCTTAAAAAAGAGCTCAGAGCTTTGGCCGTGGCCAGCAGTGCA
CTTGGACCCCTCTTCCCTCCGAGTCAATCAAGTAGGAGACCTCCCAACCGCCAGAGCTGGCTCCTTGTCTGGCCACTGAGACCCAGAAGTACCAGG
GCTGGAGTCAGCTTGCAGCACAGCCAGGGTCGAGGTCACTCCCTTCTGAGAACTCCAGCACAGCCAGCCCTCTGCCTCTCTCTGGGGGTGGCGTTGAAA
CAGCACCCGCTGCTTTGGTCTCTACAGGGTGGCAGAGAAGGAGGAGTCAATAAGTGTCCCTGCACAACCTCGCCACGGTCTTTGGCCCCACGCTGCTCCG
GCCCTCCGAGAAGGAGAGCAAGCTCCCTGCCAACCCAGCCAGCCTATCACCATGACTGACAGCTGGTCTTGGAGGTCAATGTCCAGGTATGGGAAGACAGG
CTCCAGCCATGCAACCTGACCTGACAGAGGTGGCCTCTGCCTGCCCCACCCCACTGCTGCCCCA TCTTCTTACTTGCATTTGATGTGGTGTGGCCAAACATT
CACAGAGAGGGACTTGCTTAGTCTGCATGGATGGGAGTGATAGTGGGGGCCAGGCCACCTCTGGTCTGCTAGTGCACCTTTGCTGGAAGCTTAAAACTAC
CTCAAGT↵
```

Supplementary Fig. 6. Sanger sequencing results (*BCR* gene locus).
